# Supplementary material for: Cox-nnet: An artificial neural network method for prognosis prediction of high-throughput omics data
Source: PubMed Central journal article supplement (PMC5909924; doi:10.1371/journal.pcbi.1006076), 2018-04-10

# Simulation data metrics

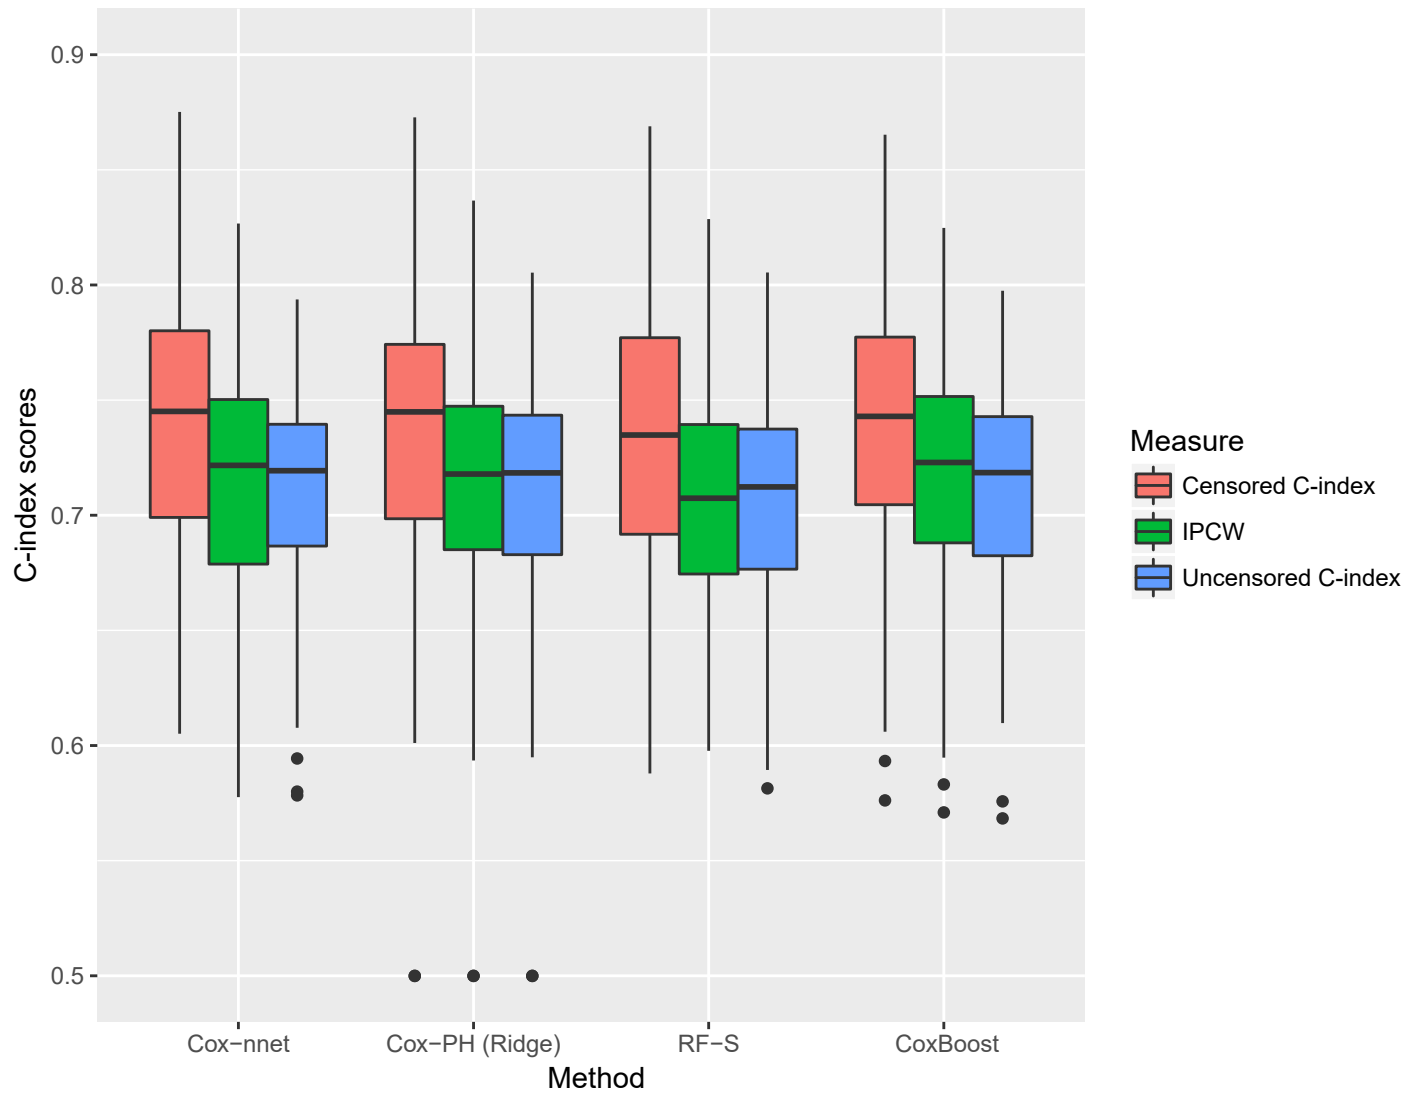

Supplement: pcbi.1006076.s010.pdf [file pcbi.1006076.s010.pdf]
