# Supplementary material for: Cox-nnet: An artificial neural network method for prognosis prediction of high-throughput omics data
Source: PubMed Central journal article supplement (PMC5909924; doi:10.1371/journal.pcbi.1006076), 2018-04-10
Supplement: pcbi.1006076.s012.pdf [file pcbi.1006076.s012.pdf]

# Cox-nnet node-associated enriched pathways

Significantly enriched pathways common for all nodes ( $p < 0.05$ )

| Pathway                                        | P.value | P.adjusted | Nodes |
|------------------------------------------------|---------|------------|-------|
| KEGG adherens junction                         | 0.000   | 0.001      | 1-20  |
| KEGG butanoate metabolism                      | 0.000   | 0.001      | 1-20  |
| KEGG cell cycle                                | 0.000   | 0.001      | 1-20  |
| KEGG citrate cycle tca cycle                   | 0.000   | 0.001      | 1-20  |
| KEGG cytokine cytokine receptor interaction    | 0.000   | 0.001      | 1-20  |
| KEGG endocytosis                               | 0.000   | 0.001      | 1-20  |
| KEGG endometrial cancer                        | 0.000   | 0.001      | 1-20  |
| KEGG fatty acid metabolism                     | 0.000   | 0.001      | 1-20  |
| KEGG insulin signaling pathway                 | 0.000   | 0.001      | 1-20  |
| KEGG lysine degradation                        | 0.000   | 0.003      | 1-20  |
| KEGG p53 signaling pathway                     | 0.000   | 0.003      | 1-20  |
| KEGG peroxisome                                | 0.000   | 0.001      | 1-20  |
| KEGG ppar signaling pathway                    | 0.000   | 0.001      | 1-20  |
| KEGG propanoate metabolism                     | 0.000   | 0.001      | 1-20  |
| KEGG prostate cancer                           | 0.000   | 0.001      | 1-20  |
| KEGG proteasome                                | 0.000   | 0.001      | 1-20  |
| KEGG proximal tubule bicarbonate reclamation   | 0.000   | 0.001      | 1-20  |
| KEGG pyruvate metabolism                       | 0.000   | 0.001      | 1-20  |
| KEGG renin angiotensin system                  | 0.000   | 0.002      | 1-20  |
| KEGG sphingolipid metabolism                   | 0.001   | 0.005      | 1-20  |
| KEGG systemic lupus erythematosus              | 0.000   | 0.001      | 1-20  |
| KEGG tight junction                            | 0.000   | 0.001      | 1-20  |
| KEGG tryptophan metabolism                     | 0.000   | 0.001      | 1-20  |
| KEGG valine leucine and isoleucine degradation | 0.000   | 0.001      | 1-20  |
| KEGG vascular smooth muscle contraction        | 0.000   | 0.001      | 1-20  |

## Additional significantly enriched pathways (p < 0.05)

| Pathway                                           | P.value | P.adjusted | Nodes                    |
|---------------------------------------------------|---------|------------|--------------------------|
| KEGG adipocytokine signaling pathway              | 0.001   | 0.005      | 1-19                     |
| KEGG beta alanine metabolism                      | 0.000   | 0.003      | 1,3-20                   |
| KEGG colorectal cancer                            | 0.000   | 0.001      | 1-13,15-20               |
| KEGG homologous recombination                     | 0.000   | 0.001      | 1-14,16-20               |
| KEGG inositol phosphate metabolism                | 0.000   | 0.004      | 1-2,4-20                 |
| KEGG neurotrophin signaling pathway               | 0.000   | 0.001      | 1-13,15-20               |
| KEGG nitrogen metabolism                          | 0.001   | 0.007      | 1-16,18-20               |
| KEGG phosphatidylinositol signaling system        | 0.000   | 0.003      | 1-2,4-20                 |
| KEGG aldosterone regulated sodium reabsorption    | 0.001   | 0.007      | 1-8,10-13,15-20          |
| KEGG focal adhesion                               | 0.000   | 0.001      | 1-13,16-20               |
| KEGG mtor signaling pathway                       | 0.002   | 0.012      | 1-5,7-13,15-20           |
| KEGG renal cell carcinoma                         | 0.000   | 0.001      | 1-13,15-18,20            |
| KEGG ribosome                                     | 0.000   | 0.001      | 1-4,6-9,11-20            |
| KEGG pathways in cancer                           | 0.000   | 0.001      | 1-13,16-18,20            |
| KEGG wnt signaling pathway                        | 0.000   | 0.003      | 1-3,5-13,16-20           |
| KEGG cytosolic dna sensing pathway                | 0.000   | 0.003      | 1-4,6-7,9,11-17,19-20    |
| KEGG intestinal immune network for iga production | 0.000   | 0.001      | 1-3,5,7-11,13-14,16-20   |
| KEGG primary immunodeficiency                     | 0.000   | 0.001      | 1-3,5,7-13,16-20         |
| KEGG terpenoid backbone biosynthesis              | 0.002   | 0.011      | 1,3-5,7-13,16-20         |
| KEGG tgf beta signaling pathway                   | 0.000   | 0.001      | 1-13,17-18,20            |
| KEGG vasopressin regulated water reabsorption     | 0.000   | 0.001      | 1-3,5,7-13,15,17-20      |
| KEGG base excision repair                         | 0.001   | 0.006      | 1-2,4-5,7-10,12-14,16-18 |
| KEGG glycolysis gluconeogenesis                   | 0.000   | 0.002      | 1,3-5,8,10-16,18-19      |
| KEGG nod like receptor signaling pathway          | 0.000   | 0.001      | 2,5-7,9,11-16,19-20      |
| KEGG erbb signaling pathway                       | 0.000   | 0.003      | 1-4,8-12,17-18,20        |
| KEGG pancreatic cancer                            | 0.001   | 0.006      | 1-4,6,8,10-13,17-18      |
| KEGG regulation of actin cytoskeleton             | 0.000   | 0.002      | 1-3,5-8,10,12-13,17-18   |
| KEGG complement and coagulation cascades          | 0.000   | 0.001      | 4-5,7-9,11,14-16,19      |
| KEGG dna replication                              | 0.000   | 0.001      | 2,5,7,9,12-14,16,18-19   |

| <b>Pathway</b>                                            | <b>P.value</b> | <b>P.adjusted</b> | <b>Nodes</b>          |
|-----------------------------------------------------------|----------------|-------------------|-----------------------|
| KEGG glycosaminoglycan biosynthesis chondroitin sulfate   | 0.001          | 0.005             | 2,4,6,9,14-17,19-20   |
| KEGG non small cell lung cancer                           | 0.002          | 0.012             | 1,3-4,6,8,10-11,15,17 |
| KEGG pathogenic escherichia coli infection                | 0.000          | 0.001             | 2,4,6-7,9,14-16,19    |
| KEGG chronic myeloid leukemia                             | 0.001          | 0.009             | 1,3,8,10-12,17-18     |
| KEGG pyrimidine metabolism                                | 0.000          | 0.004             | 2,4,6-9,14,17         |
| KEGG thyroid cancer                                       | 0.006          | 0.023             | 1,3,5,8,10,12,17-18   |
| KEGG graft versus host disease                            | 0.000          | 0.001             | 7-9,11,16,19-20       |
| KEGG leukocyte transendothelial migration                 | 0.003          | 0.014             | 1,3,5,10,12-13,18     |
| KEGG melanoma                                             | 0.005          | 0.023             | 1,3,8,10,12,17-18     |
| KEGG arginine and proline metabolism                      | 0.004          | 0.019             | 1,3-4,8,10,12         |
| KEGG histidine metabolism                                 | 0.004          | 0.019             | 3-4,9,12,14,19        |
| KEGG oxidative phosphorylation                            | 0.000          | 0.001             | 1,5,10,12-13,19       |
| KEGG long term potentiation                               | 0.004          | 0.020             | 1,10,12,17-18         |
| KEGG taste transduction                                   | 0.005          | 0.021             | 1-3,5,12              |
| KEGG acute myeloid leukemia                               | 0.012          | 0.041             | 4,8,10,17             |
| KEGG allograft rejection                                  | 0.000          | 0.001             | 8-9,16,19             |
| KEGG arrhythmogenic right ventricular cardiomyopathy arvc | 0.011          | 0.038             | 2-3,7,18              |
| KEGG glioma                                               | 0.006          | 0.025             | 1,8,10,17             |
| KEGG leishmania infection                                 | 0.000          | 0.001             | 9,14,16,19            |
| KEGG lysosome                                             | 0.000          | 0.002             | 1,3,10,12             |
| KEGG natural killer cell mediated cytotoxicity            | 0.000          | 0.001             | 7,9,16,19             |
| KEGG o glycan biosynthesis                                | 0.008          | 0.031             | 1-2,6,17              |
| KEGG parkinsons disease                                   | 0.005          | 0.020             | 1,5,10,12             |
| KEGG spliceosome                                          | 0.001          | 0.007             | 6,11,14,17            |
| KEGG calcium signaling pathway                            | 0.003          | 0.015             | 1,12,18               |
| KEGG gap junction                                         | 0.007          | 0.028             | 1,17-18               |
| KEGG hematopoietic cell lineage                           | 0.000          | 0.001             | 9,16,19               |
| KEGG small cell lung cancer                               | 0.005          | 0.022             | 8,10,17               |
| KEGG toll like receptor signaling pathway                 | 0.000          | 0.002             | 9,16,19               |
| KEGG type i diabetes mellitus                             | 0.000          | 0.001             | 9,16,19               |

| <b>Pathway</b>                                      | <b>P.value</b> | <b>P.adjusted</b> | <b>Nodes</b> |
|-----------------------------------------------------|----------------|-------------------|--------------|
| KEGG ubiquitin mediated proteolysis                 | 0.006          | 0.026             | 1,10,17      |
| KEGG amyotrophic lateral sclerosis als              | 0.012          | 0.041             | 6,19         |
| KEGG antigen processing and presentation            | 0.000          | 0.001             | 16,19        |
| KEGG autoimmune thyroid disease                     | 0.000          | 0.002             | 16,19        |
| KEGG chemokine signaling pathway                    | 0.000          | 0.001             | 16,19        |
| KEGG fc epsilon ri signaling pathway                | 0.013          | 0.043             | 4,17         |
| KEGG huntingtons disease                            | 0.004          | 0.020             | 1,19         |
| KEGG jak stat signaling pathway                     | 0.002          | 0.011             | 16,19        |
| KEGG long term depression                           | 0.006          | 0.024             | 1,17         |
| KEGG melanogenesis                                  | 0.012          | 0.040             | 10,18        |
| KEGG prion diseases                                 | 0.006          | 0.025             | 14,19        |
| KEGG alzheimers disease                             | 0.003          | 0.013             | 1            |
| KEGG ascorbate and aldarate metabolism              | 0.003          | 0.016             | 4            |
| KEGG asthma                                         | 0.003          | 0.016             | 19           |
| KEGG basal cell carcinoma                           | 0.006          | 0.023             | 4            |
| KEGG cell adhesion molecules cams                   | 0.006          | 0.024             | 19           |
| KEGG drug metabolism cytochrome p450                | 0.012          | 0.040             | 4            |
| KEGG fc gamma r mediated phagocytosis               | 0.004          | 0.017             | 19           |
| KEGG glycine serine and threonine metabolism        | 0.009          | 0.033             | 4            |
| KEGG glycosaminoglycan biosynthesis keratan sulfate | 0.010          | 0.035             | 14           |
| KEGG mismatch repair                                | 0.016          | 0.050             | 7            |
| KEGG primary bile acid biosynthesis                 | 0.007          | 0.026             | 5            |
| KEGG purine metabolism                              | 0.012          | 0.041             | 14           |
| KEGG steroid biosynthesis                           | 0.008          | 0.029             | 19           |
| KEGG t cell receptor signaling pathway              | 0.004          | 0.017             | 19           |
| KEGG viral myocarditis                              | 0.000          | 0.003             | 19           |
