# Supplementary material for: Cox-nnet: An artificial neural network method for prognosis prediction of high-throughput omics data
Source: PubMed Central journal article supplement (PMC5909924; doi:10.1371/journal.pcbi.1006076), 2018-04-10
Supplement: pcbi.1006076.s013.pdf [file pcbi.1006076.s013.pdf]

# GSEA enrichment of Cox-PH associated cancer pathways

List of significantly enriched pathways (p < 0.05)

| Pathway                                                         | E.score | P.value | P.adjusted |
|-----------------------------------------------------------------|---------|---------|------------|
| KEGG cell cycle                                                 | -0.407  | 0.000   | 0.003      |
| KEGG citrate cycle tca cycle                                    | 0.607   | 0.000   | 0.003      |
| KEGG fatty acid metabolism                                      | 0.561   | 0.000   | 0.003      |
| KEGG lysosome                                                   | 0.410   | 0.000   | 0.003      |
| KEGG oxidative phosphorylation                                  | 0.418   | 0.000   | 0.003      |
| KEGG proximal tubule bicarbonate reclamation                    | 0.633   | 0.000   | 0.003      |
| KEGG valine leucine and isoleucine degradation                  | 0.577   | 0.000   | 0.003      |
| KEGG olfactory transduction                                     | 0.294   | 0.000   | 0.005      |
| KEGG cytokine cytokine receptor interaction                     | -0.330  | 0.000   | 0.005      |
| KEGG proteasome                                                 | -0.540  | 0.000   | 0.005      |
| KEGG vascular smooth muscle contraction                         | 0.391   | 0.000   | 0.005      |
| KEGG peroxisome                                                 | 0.415   | 0.000   | 0.006      |
| KEGG tight junction                                             | 0.343   | 0.000   | 0.006      |
| KEGG propanoate metabolism                                      | 0.518   | 0.001   | 0.009      |
| KEGG ppar signaling pathway                                     | 0.406   | 0.001   | 0.011      |
| KEGG renin angiotensin system                                   | 0.645   | 0.001   | 0.011      |
| KEGG systemic lupus erythematosus                               | -0.377  | 0.001   | 0.014      |
| KEGG prostate cancer                                            | 0.368   | 0.002   | 0.016      |
| KEGG pathogenic escherichia coli infection                      | -0.433  | 0.003   | 0.034      |
| KEGG endometrial cancer                                         | 0.409   | 0.004   | 0.040      |
| KEGG butanoate metabolism                                       | 0.458   | 0.005   | 0.042      |
| KEGG epithelial cell signaling in helicobacter pylori infection | 0.361   | 0.006   | 0.047      |
| KEGG nod like receptor signaling pathway                        | -0.407  | 0.006   | 0.047      |
| KEGG beta alanine metabolism                                    | 0.521   | 0.006   | 0.047      |
| KEGG complement and coagulation cascades                        | -0.393  | 0.007   | 0.047      |

| <b>Pathway</b>                       | <b>E.score</b> | <b>P.value</b> | <b>P.adjusted</b> |
|--------------------------------------|----------------|----------------|-------------------|
| KEGG tryptophan metabolism           | 0.427          | 0.007          | 0.047             |
| KEGG arginine and proline metabolism | 0.381          | 0.007          | 0.047             |
| KEGG calcium signaling pathway       | 0.272          | 0.007          | 0.047             |
| KEGG spliceosome                     | -0.333         | 0.007          | 0.047             |
| KEGG parkinsons disease              | 0.304          | 0.008          | 0.048             |
