# Supplementary material for: Cox-nnet: An artificial neural network method for prognosis prediction of high-throughput omics data
Source: PLoS Comput Biol. 2018 Apr 10;14(4):e1006076. doi: 10.1371/journal.pcbi.1006076 (PMC5909924; doi:10.1371/journal.pcbi.1006076)
Supplement: S4 Table — (XLSX) [file pcbi.1006076.s014.xlsx]

## Sheet: Sheet1
Cox-PH
ADAMTS14,AGAP6,CHAT,DONSON,FAM193B,GOLGA8E,KRT25,L2HGDH,LOC100128076,LOC100272146,LOC150776,MAP7,MC1R,NUMBL,OR12D2,OR2H1,PABPC1L,RNASE11,SLC22A24,STEAP3
CoxBoost
AJAP1,CENPBD1,CYP3A7,DONSON,DPP6,GCNT4,IGFN1,LOC100130274,LOC286467,MEP1A,MSH3,MSTO1,MUC5B,OR12D2,OR2H1,OTX1,RELN,RNASE11,SEMA3G,SNORA79
RF
AGAP6,ATF5,BARX1,C1orf94,CYP26B1,DONSON,EME1,FUCA1,GIT2,IFITM5,LOC100129055,LOC100272146,LOC286467,MICALL2,OR12D2,OR2H1,PCDHGC5,SAPS3,THBS3,TSLP
Coxnnet
ACADSB,ADAMTS14,AKAP6,ALDH6A1,ANKRD56,CDHR4,DONSON,FKBP11,ITGA6,LOC286467,MSTO1,NOP2,NUMBL,OTX1,PCCA,PPAP2B,PTPRG,SHOX2,TEK,TNNT1
